# Supplementary material for: Mahuang-Fuzi-Xixin Decoction Reverses Depression-Like Behavior in LPS-Induced Mice by Regulating NLRP3 Inflammasome and Neurogenesis
Source: Neural Plast. 2019 Nov 11;2019:1571392. doi: 10.1155/2019/1571392 (PMC6877957; doi:10.1155/2019/1571392)
Supplement: Supplementary Materials — The behavioral indexes and protein data used to support the findings of this study were available in the supplementary material. [file 1571392.f1.zip]

Archive with 3 entries (3 files):
- behavior tests and blots.pptx
- Table S1.xls
- Table S2.xls
