# Supplementary material for: Mahuang-Fuzi-Xixin Decoction Reverses Depression-Like Behavior in LPS-Induced Mice by Regulating NLRP3 Inflammasome and Neurogenesis
Source: Neural Plast. 2019 Nov 11;2019:1571392. doi: 10.1155/2019/1571392 (PMC6877957; doi:10.1155/2019/1571392)
Supplement: Supplementary Materials — The behavioral indexes and protein data used to support the findings of this study were available in the supplementary material. [file 1571392.f1.zip › Table S1.xls]

## Sheet: Sheet1
Behavioral indexes in normal mice
OFT-time in center
CON	ESC	MFX-L	MFX-M	MFX-H
60.39	45.68	71.44	40.95	21.89
30.09	35.93	47.51	31.22	32.34
52.74	45.19	48.59	48.74	36.06
46.26	25.73	50.49	47.74	38.43
41.67	28.62	41.11	46.82	35.14
31.24	36.62	30.44	30.73	65.64
54.15	42.58	29.35	36.29	67.42
50.76	48.22	42.1	47.09	55.93
48.82	50.76	42.34	56.82	26.98
53.26	78.94	60.7	33.4	43.06
65.07	49.59	28.05	36.91	49.75
48.22	56.23	21.81
39.64
OFT-total distance
CON	ESC	MFX-L	MFX-M	MFX-H
13697	14153.5	14056.4	17336.5	22379.1
14198.6	15273.1	15145.3	19052.7	25483.9
14514.4	19411.6	17447	15971.6	15225.9
19910.7	16084.2	16016.3	13645.3	16791.5
13379.7	16191	14088.5	14879.7	16062.4
12698.5	20166.2	12939.3	17986.8	15335.4
19023.4	20178	17780.3	21730.8	17472.8
20294.3	16834.2	12487.8	12888.2	15861.9
11792.4	16446.6	16736.6	14374.2	13334.8
14151	19335.9	17749.4	18401.6	13646.8
14683.5	19193.2	15674.1	17599.8	18865.8
18983.2	14043.4	12929.7
15634.9
TST
CON	ESC	MFX-L	MFX-M	MFX-H
113.5	101.1	75.2	105	75.2
94.7	49.6	50.4	74.6	62.8
108	68.4	100.1	84.5	34
110.5	95.8	71.5	40	68.3
161.7	32.4	135.6	51.9	98.1
143.9	59.9	64.8	77.6	95.7
78.6	55.2	63	94.8	38.3
122.4	48.9	41.4	100	46.4
94.3	33.1	50.7	87	40.9
119.3	59.2	102.3	66.7
122.2	63	60.8
86.9
FST
CON	ESC	MFX-L	MFX-M	MFX-H
60.4	80.5	55.2	82.6	43.8
97.8	26.6	71	63.7	80.2
79.3	33.1	43.4	29.6	87.9
86.5	42.7	64.5	79.9	35.1
111	79.4	36.4	72.8	71.5
93.3	66.1	70.3	62.4	80.9
67.5	57.5	25.3	21.2	62.8
133.4	38.7	76.1	53.9	76.8
84.6	52.9	77.1	77.2	29.8
	24.8	66.9	48.9
		78
Body weight
CON	ESC	MFX-L	MFX-M	MFX-H
20.75	19.88	19.55	18.87	17.84
20.36	19.59	20.23	20.35	20.87
18.63	23.72	20.69	23.21	17.31
18.1	21.54	21.48	20.46	21.03
19.73	20.98	20	19.63	19.52
21.14	20.02	19.9	20.77	19.27
19.34	21.55	18.86	19.36	21.19
22.54	21.84	21.44	21.24	19.66
19.38	19.23	18.7	18.7	18.71
20.03	20.45	19.27	19.07	21.17
20.01	18.75	18.11	20.22	19.3
20.89	18.81	21.26
20.53
Behavioral indexes in LPS-injected mice
OFT-total distance
CON	LPS	LPS+ESC	LPS+MFX-L	LPS+MFX-M	LPS+MFX-H
50.61	28.57	40.01	22.76	40.01	34.59
56.44	29.06	54.76	81.08	54.36	40.66
76.3	31.32	46.28	47.76	63.57	33.12
46.51	28.36	35	10.02	66.24	39.27
83.6	32.12	59.88	42.48	47.16	27
70.72	27.47	55.91	48.03	53.48	29
111.32	15.72	66.21	48.08
59.78		43.92	29.56
OFT-total distance
CON	LPS	LPS+ESC	LPS+MFX-L	LPS+MFX-M	LPS+MFX-H
16244.2	9523.9	12563.7	10611.6	13388.1	12317.4
13956.1	6136.03	12154.5	11761.1	12250.5	12366.7
13475.9	7857.46	13772	11357.7	12211.4	12346.7
13883.9	8257.93	13175.3	12331.7	12043.4	11104.3
13354.1	1249.48	14111.5	10249.5	11148.2	12248.7
12924.4	9410.24	14460.8	11082.4	12628.5	11235.7
13977	2076.06	13778.2	11787.4	11044.3
14758.7	8341.59	13075	12279.8	11842.5
14063.5	9205.89	12875.7	11508.9	13554.7
	8702.24	12416.4	10318.2
TST
CON	LPS	LPS+ESC	LPS+MFX-L	LPS+MFX-M	LPS+MFX-H
76.7	111	168	136.9	145.7	108
109.2	160.6	112.8	104.1	126.7	57.2
89.3	190.8	94.1	77.2	94.7	58.5
113.9	132.4	141.7	147.5	44.7	98.7
127.9	154	159.8	130	116.5	80.2
108	124.4	30.8	143.4	35.5	79
134.1	145.8	103.3	71.9	91.6
65.9	151.3	129.9
	103.1	53.3
FST
CON	LPS	LPS+ESC	LPS+MFX-L	LPS+MFX-M	LPS+MFX-H
50.3	104.5	142.6	119.4	84.4	52.8
91.2	89.7	61.9	42.8	41.1	126.5
103.1	100.6	58.2	84.9	76.9	80.2
77.8	156.6	45.2	67.2	61.1	101.9
35.7	131.5	127.2	58.2	40.6	91.7
72.3	154.1	100.4	125.3	25.6	33.3
68.8	96.9	138	125.5	99.4
97.5	239.8	32.3	106.1
	92.7	43.5
Body weight loss
CON	LPS	LPS+ESC	LPS+MFX-L	LPS+MFX-M	LPS+MFX-H
1.35	2.04	0.72	1.44	2.33	1.81
1.97	1.91	1.35	1.49	2	2.97
1.35	1.9	1.41	1.62	2.32	2.02
2.5	1.77	1.04	2.44	2	2.63
0.5	2.07	0.77	2.25	1.77	2.38
0.01	2.69	1.91	2.5	2.61	1.14
1.11	2.26	1.85	1.43	2.63
1.1	3.06	1.84	1.75	1.57
1.81	2.58	2.26	2.07	2.18
	2.41	2.72	1.98
