# Supplementary material for: Mahuang-Fuzi-Xixin Decoction Reverses Depression-Like Behavior in LPS-Induced Mice by Regulating NLRP3 Inflammasome and Neurogenesis
Source: Neural Plast. 2019 Nov 11;2019:1571392. doi: 10.1155/2019/1571392 (PMC6877957; doi:10.1155/2019/1571392)
Supplement: Supplementary Materials — The behavioral indexes and protein data used to support the findings of this study were available in the supplementary material. [file 1571392.f1.zip › Table S2.xls]

## Sheet: Sheet1
Hippocampal protein concentration in LPS-induced mice-Narodrop 2000
	weight of hippocampal (mg)	RIPA	cocktail (25×)
CON1	20	200	8
CON2	21	210	8.4
CON3	21	210	8.4
LPS1	10	100	4
LPS2	18	180	7.2
LPS3	25	250	10
ESC1	20	200	8
ESC2	18	180	7.2
ESC3	24	240	9.6
MFX-M1	23	230	9.2
MFX-M2	24	240	9.6
MFX-M3	20	200	8
	PMSF (100×)	Supernatant volume	concentration
CON1	2	100	32.103
CON2	2.1	130	32.621
CON3	2.1	180	31.953
LPS1	1	90	36.608
LPS2	1.8	180	32.419
LPS3	2.5	210	31.581
ESC1	2	175	32.324
ESC2	1.8	165	32.012
ESC3	2.4	200	31.659
MFX-M1	2.3	140	31.618
MFX-M2	2.4	190	31.937
MFX-M3	2	180	29.488
Protein expression data
	CON	LPS	ESC	MFX-M
NLRP3	81949	97819	73770	61970
118kd	84760	98245	96672	31804
	51044	101966	66475	45688
GAPDH	269871	232805	245566	234320
	230135	190584	214927	191733
	169848	172316	212182	170207
NLRP3/GAPDH	0.30366	0.420176	0.300408	0.264467
	0.368306	0.515494	0.44979	0.165877
	0.300528	0.591738	0.313292	0.268426
mean	0.324164	0.509136	0.354497	0.232923
NLRP3/GAPDH	0.936747	1.29618	0.926715	0.815844
normalization	1.13617	1.59023	1.38754	0.511705
	0.927084	1.82543	0.966462	0.828056
	CON	LPS	ESC	MFX-M
ASC	102856	111889	110409	79025
22kd	84480	123978	98135	85282
	60613	109044	101286	47611
Tubulin	196268	172239	199721	196256
	203487	187381	173684	199703
	162554	151290	142745	90978
ASC/Tubulin	0.524059	0.649615	0.552816	0.402663
	0.415162	0.661636	0.56502	0.427044
	0.372879	0.720761	0.709559	0.523324
mean	0.437367	0.677337	0.609132	0.45101
ASC/Tubulin	1.19821	1.48529	1.26397	0.920653
normalization	0.94923	1.51277	1.29187	0.976399
	0.852555	1.64796	1.62234	1.19653
	CON	LPS	ESC	MFX-M
cl-Caspase-1	28711	52806	31325	53176
20kd	43315	44110	47537	38621
	43139	50224	41825	19485
pro-Caspase-1	60323	60995	59299	80549
45kd	68882	59610	77460	83417
	79260	63764	64902	40352
cl-Caspase-1/pro-caspase-1	0.475954	0.865743	0.528255	0.66017
	0.628829	0.739977	0.613697	0.462987
	0.544272	0.787654	0.644433	0.482876
mean	0.549685	0.797791	0.595462	0.535344
cl-caspase-1/pro-caspase-1	0.865867	1.57498	0.961014	1.201
normalization	1.14398	1.34618	1.11645	0.842277
	0.990152	1.43292	1.17237	0.878459
	CON	LPS	ESC	MFX-M
IL-1β	43192	70915	55109	58524
17kd	71095	103871	87117	63693
	59498	115863	68643	40619
GAPDH	138660	123901	122446	142458
	176283	188229	180021	179995
	160039	140244	148493	114163
IL-1β/GAPDH	0.311496	0.572352	0.450068	0.410816
	0.4033	0.551833	0.483927	0.35386
	0.371772	0.826153	0.462264	0.355798
mean	0.362189	0.650113	0.46542	0.373491
IL-1β/GAPDH	0.860036	1.58026	1.24263	1.13426
normalization	1.11351	1.5236	1.33612	0.977002
	1.02646	2.281	1.27631	0.982354
	CON	LPS	ESC	MFX-M
TXNIP	11959	21125	14651	15697
44kd	15932	18588	14700	14069
	11285	14821	11504	13742
GAPDH	28526	27782	30801	32549
	27605	27690	27984	29601
	22793	23374	26007	25572
TXNIP/GAPDH	0.419232	0.760384	0.475666	0.482258
	0.577142	0.671289	0.5253	0.475288
	0.495108	0.634081	0.442342	0.537385
mean	0.497161	0.688585	0.481103	0.49831
TXNIP/GAPDH	0.843252	1.52945	0.956766	0.970024
normalization	1.16088	1.35025	1.0566	0.956005
	0.995872	1.2754	0.889738	1.08091
	CON	LPS	ESC	MFX-M
BDNF	82107	61999	71102	85899
15kd	90596	46018	53189	77812
	90494	53283	51602	72906
Tubulin	203051	202871	198394	157641
	182635	201960	171377	212389
	183551	189148	185661	182534
BDNF/Tubulin	0.404366	0.305608	0.358388	0.544903
	0.496049	0.227857	0.310363	0.366365
	0.493018	0.2817	0.277937	0.399411
mean	0.464478	0.271722	0.315562	0.436893
BDNF/Tubulin	0.870582	0.65796	0.771593	1.17315
normalization	1.06797	0.490566	0.668196	0.788768
	1.06145	0.606487	0.598385	0.859913
	CON	LPS	ESC	MFX-M
DCX	117634	52602	83046	88615
43kd	88488	63523	79250	86062
	88785	73080	86433	86062
GAPDH	184455	171828	176558	177470
	176283	174660	177611	172576
	186787	182220	172576	190108
DCX/GAPDH	0.637738	0.306132	0.470361	0.499324
	0.501966	0.363695	0.4462	0.49869
	0.475328	0.401054	0.50084	0.452701
mean	0.538344	0.35696	0.472467	0.483572
DCX/GAPDH	1.18463	0.568655	0.873719	0.927519
normalization	0.932426	0.675582	0.828838	0.926342
	0.882944	0.744977	0.930335	0.840914
	CON	LPS	ESC	MFX-M
Trkb	15488	9960	12945	11290
140kd	13838	10990	12584	12261
	11305	9097	10946	10858
GAPDH	38349	37064	36949	36542
	37813	38976	37919	37691
	27475	29884	28651	28386
trkb/gapdh	0.40387	0.268724	0.350348	0.30896
	0.365959	0.281968	0.331865	0.325303
	0.411465	0.30441	0.382046	0.382513
mean	0.393764	0.285034	0.354753	0.338925
Trkb/GAPDH	1.02566	0.682449	0.889739	0.78463
normalization	0.929385	0.716084	0.842801	0.826136
	1.04495	0.773077	0.97024	0.971425
